# Supplementary material for: Favorable clinical outcomes of checkpoint inhibitor-based combinations after progression with immunotherapy in advanced non-small cell lung cancer
Source: PubMed Central journal article supplement (PMC9086517; doi:10.20517/cdr.2021.28), 2021-05-24
Supplement: cdr-4-728-SupplementaryMaterials.pdf [file cdr-4-728-SupplementaryMaterials.pdf]

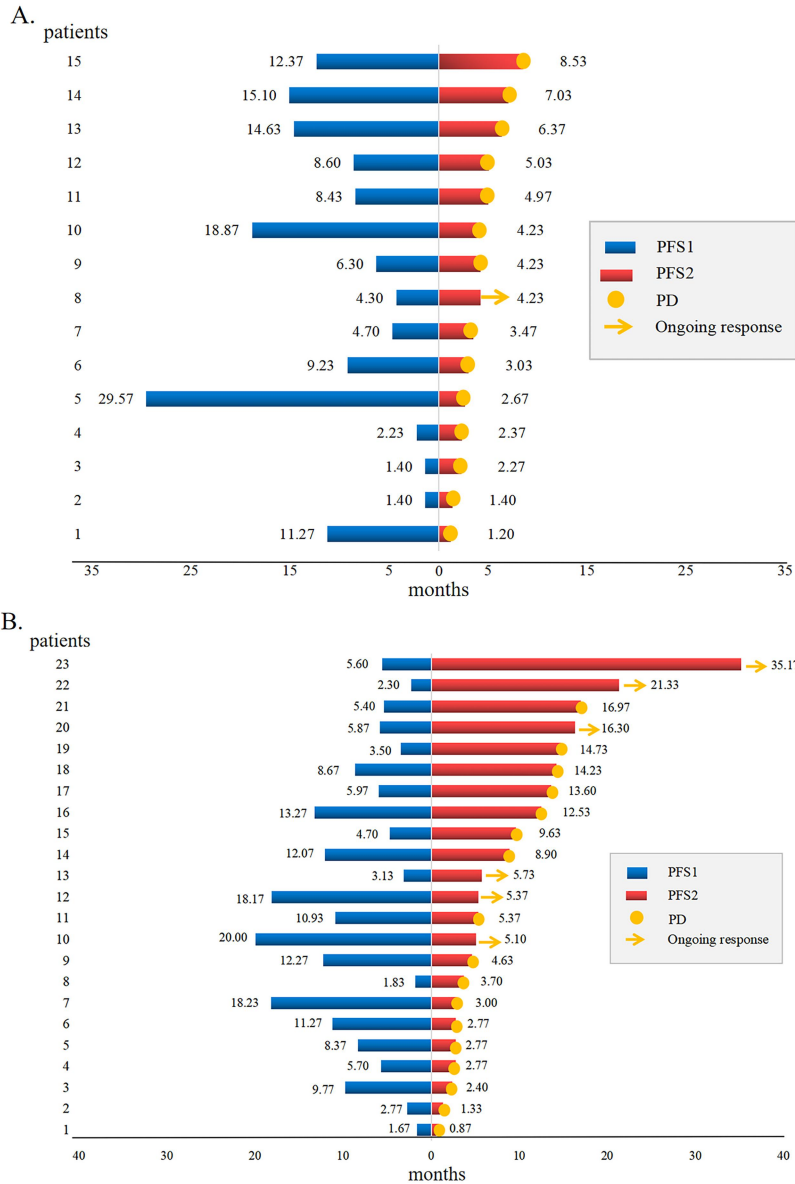

**Supplementary Figure 1.** Swimmers plot showing the PFS of immunotherapy and subsequent therapy. Each bar represents one patient. **A:** Patients treated with ICIs monotherapy beyond progression. **B:** Patients treated with ICIs combination therapy beyond progression. PFS: progression-free survival, PD: progressive disease.

**Supplementary Table 1.** Progression sites after ICIs failure

| <b>Progression sites</b> | <b>Total<br/>n(%)</b> | <b>Oligoprogression<br/>n(%)</b> | <b>Systemic progression<br/>n(%)</b> | <b><i>p</i>-value</b> |
|--------------------------|-----------------------|----------------------------------|--------------------------------------|-----------------------|
| <b>Lung</b>              | 79 (66.9)             | 29 (63.0)                        | 50 (69.4)                            | 0.471                 |
| <b>Bone</b>              | 15 (12.7)             | 6 ((13.0)                        | 9 (12.5)                             | 0.931                 |
| <b>Lymph nodes</b>       | 13 (11.0)             | 3 (6.5)                          | 10 (13.9)                            | 0.213                 |
| <b>Brain</b>             | 12 (10.2)             | 6 (13.0)                         | 6 (8.3)                              | 0.409                 |
| <b>Pleura</b>            | 12 (10.2)             | 0(0)                             | 12 (16.7)                            | 0.003                 |
| <b>Liver</b>             | 7 (5.9)               | 2 (4.3)                          | 5 (6.9)                              | 0.560                 |
| <b>Adrenal</b>           | 4 (3.4)               | 2 (4.3)                          | 2 (2.8)                              | 0.646                 |
| <b>Soft tissue</b>       | 3 (2.5)               | 2 (4.3)                          | 1 (1.4)                              | 0.319                 |
| <b>Pericardium</b>       | 3 (2.5)               | 0(0)                             | 3 (4.2)                              | 0.161                 |

ICIs: immune checkpoint inhibitors.
